# Supplementary material
Source: PubMed Central journal article supplement (PMC3165754)
Supplement: supp_85_18_9254__1.pdf [file supp_85_18_9254__1.pdf]

1 **Supplementary Table 1**

| <b>BAC</b>           | <b>virus</b>      | <b>description</b>                                                                                                                                                                                               |
|----------------------|-------------------|------------------------------------------------------------------------------------------------------------------------------------------------------------------------------------------------------------------|
| pSM3fr-FRT           | MCMV-FRT          | Complete MCMV genome including FRT site between genes m16 and m17 (Bubic_Koszinowski-2004)                                                                                                                       |
| pSM3fr-Δ1-16-FRT     | MCMVΔ1-16-FRT     | MCMV genome deleted in genes m16 to m17 including FRT site between genes m16 and m17                                                                                                                             |
| pSM3fr-flox-ova-ΔM94 | MCMVΔM94tTA       | MCMV genome with m157 replaced by floxed ova-cassette and M94 replaced by tTA-cassette (Mohr_Sacher-2010)                                                                                                        |
| pSM3fr-ΔM94-EPM94    | MCMVΔM94-EPM94    | MCMV genome with M94 replaced by kanamycin-cassette and ectopic insertion of M94 including its own promoter                                                                                                      |
| pSM3fr-ΔM94-EHAM94   | MCMVΔM94-EHAM94   | MCMV genome with M94 replaced by kanamycin-cassette and ectopic insertion of N-terminal HA-tagged M94 under control of HCMV immediate early promoter enhancer (CMV-promoter)                                     |
| pSM3fr-Δ1-16-RM94i7  | MCMVΔ1-16-RM94i7  | MCMV genome deleted in genes m01 to m16 and ectopic insertion of HA-M94 including 5 aa insertion at position 7 in the conditional expression cassette (Rupp_Koszinowski-2005) under control of the SVT-promoter  |
| pSM3fr-Δ1-16-RM94i13 | MCMVΔ1-16-RM94i13 | MCMV genome deleted in genes m01 to m16 and ectopic insertion of HA-M94 including 5 aa insertion at position 13 in the conditional expression cassette (Rupp_Koszinowski-2005) under control of the SVT-promoter |
| pSM3fr-RM94i13       | MCMV-RM94i13      | MCMV genome with ectopic insertion of HA-M94 including 5 aa insertion at position 13 in the conditional expression cassette (Rupp_Koszinowski-2005) under control of the SVT-promoter                            |
| pSM3fr-Δ1-16-RHAM94  | MCMVΔ1-16-RHAM94  | MCMV genome deleted in genes m01 to m16 and ectopic insertion of HA-M94 in the conditional expression cassette (Rupp_Koszinowski-2005) under control of the SVT-promoter                                         |
| pSM3fr-Δ1-16-EHAM94  | MCMVΔ1-16-EHAM94  | MCMV genome deleted in genes m01 to m16 and ectopic insertion of HA-M94 under control of the CMV-promoter                                                                                                        |

## Supplementary Figure 1

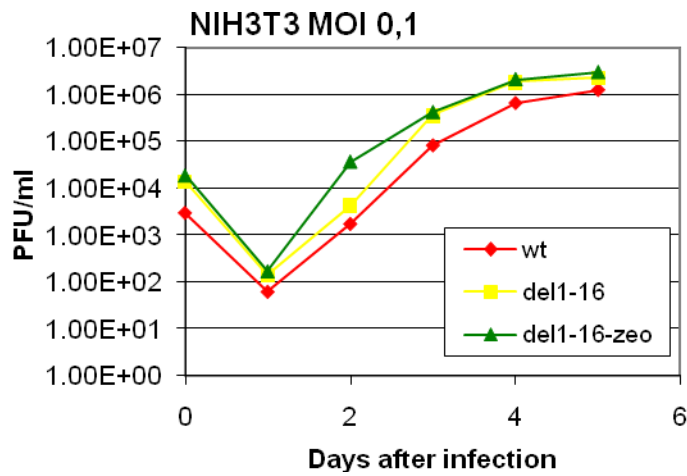

### **Growth kinetics of MCMV mutants deleted of the left terminal genome region.**

The release of infectious viral progeny at indicated timepoints was quantified under multistep growth conditions after infection of NIH/3T3 cells at a MOI of 0.1 with either wt BAC-derived wild type MCMV (wt), MCMV $\Delta$ 1-16 (del1-16), or MCMV $\Delta$ 1-16-zeo (del1-16-zeo). The latter was derived from pSMfr3- $\Delta$ 1-16 BAC by the insertion of an empty pori6K-ie-zeo rescue vector. The results showed that there is no significant difference between the replication of wt MCMV and the deletion mutants lacking genes m1 to m16.

## Supplementary Figure 2

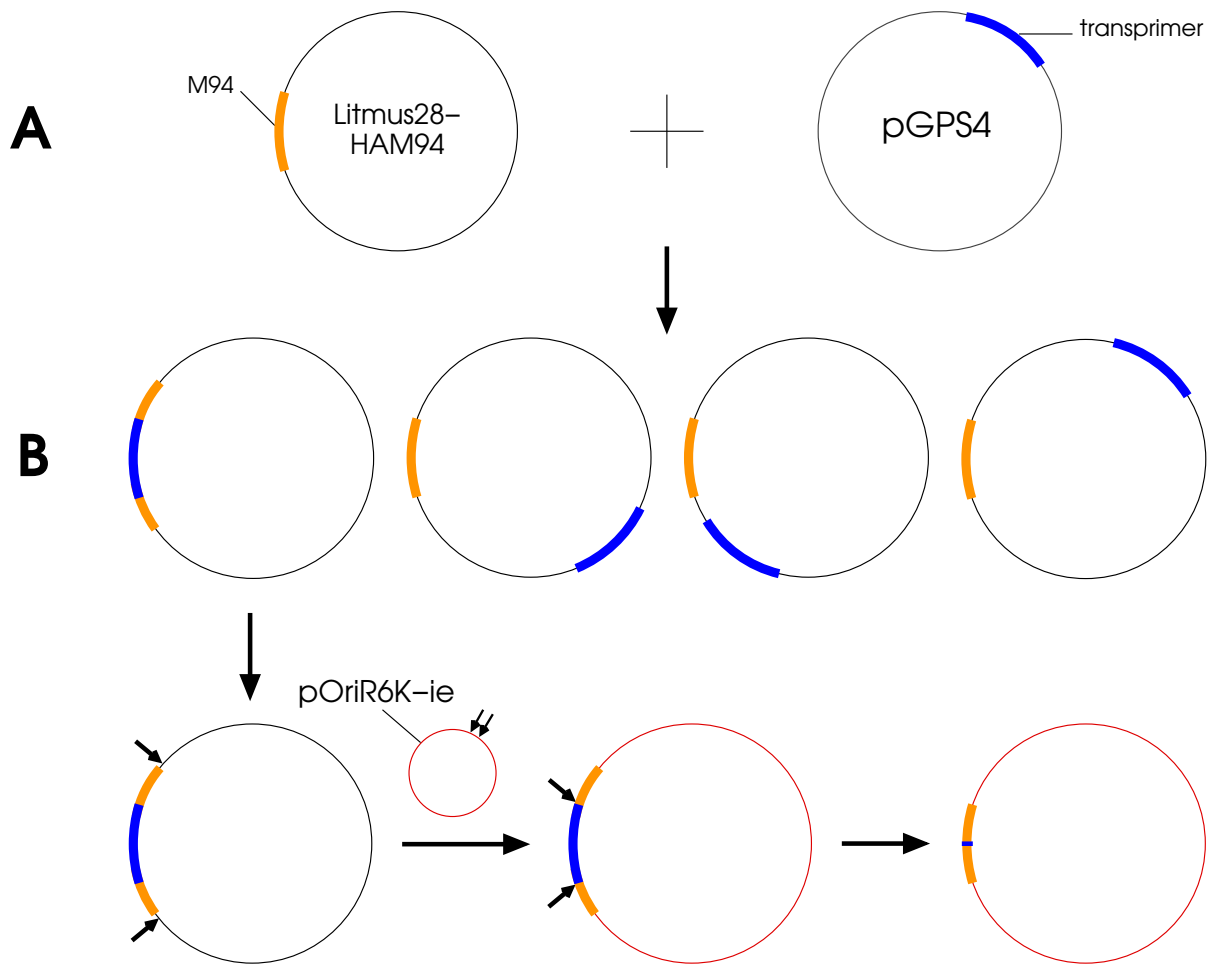

**Modified transposon mutagenesis.** (A) The transprimer (blue) was excised from the donor vector pGPS4 and randomly inserted into the target vector Litmus28-HAM94, containing a HA-tagged M94 (orange). (B) The pool of mutants with random transprimer insertions in the HA-M94 gene was then subcloned into the expression vector pOriR6K-ie. Most of the transprimer sequence was subsequently removed by a digest with PmeI, leaving a 15 bp insertion.

### Supplementary Figure 3

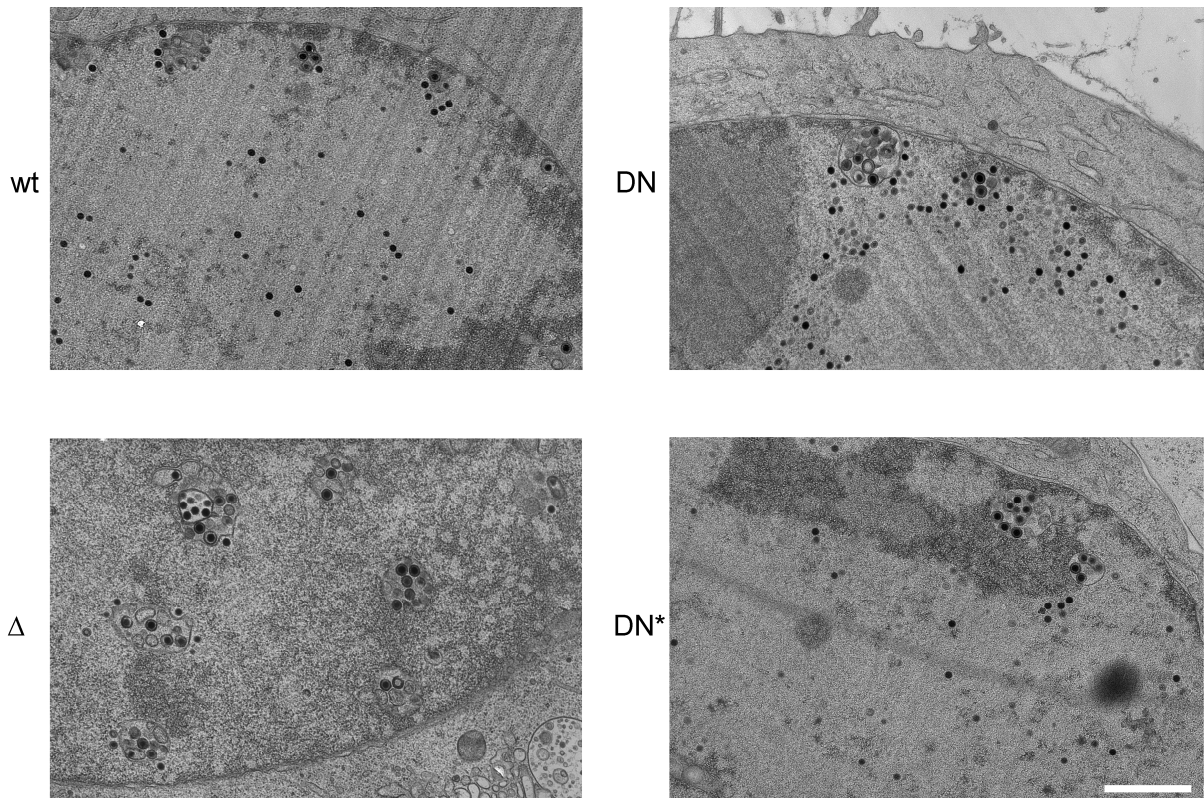

**Ultra structural analysis of M94 mutants.** NIH/3T3 cells were infected with MCMV $\Delta$ 1-16-FRT (wt), MCMV $\Delta$ M94tTA ( $\Delta$ ) and MCMV $\Delta$ 1-16-RM94i13 in absence (DN) or presence (DN\*) of Dox at a MOI of 1 followed by centrifugal enhancement. Cells were fixed 48 h after infection and prepared for electron microscopy by high-pressure freezing. The samples were freeze-substituted, plastic-embedded, thin-sectioned and analyzed by transmission electron microscopy. Representative examples are shown for the characteristic nuclear phenotypes. The scale bar represents 1  $\mu$ m.
